# Supplementary material for: A novel biocompatible double network hydrogel consisting of konjac glucomannan with high mechanical strength and ability to be freely shaped
Source: Royal Society of Chemistry journal article supplement (doi:10.1039/c4tb01653j), 2015-01-01
Supplement: c4tb01653j1.pdf [file c4tb01653j1.pdf]

## Supporting Information

### **Novel Biocompatible Double Network Hydrogels Consisting of Konjac Glucomannan with High Mechanical Strength and Free-shapeable Ability**

Zhiyong Li, Yunlan Su\*, Baoquan Xie, Xianggui Liu, Xia Gao, Dujin Wang\*

Beijing National Laboratory for Molecular Sciences, Key Laboratory of Engineering  
Plastics, Institute of Chemistry, Chinese Academy of Sciences, Beijing 100190, P. R.  
China

## **Experiment**

### **Rheological experiments**

The hydrogels swollen to equilibrium state were used for rheological experiments. Rheological properties of the samples were measured using a DHR-2 stress controlled rheometer (TA Instruments). Frequency sweep and amplitude sweep experiments were performed at 30°C using a 25 mm parallel plate geometry.

## Results and discussion

### Supporting Figures

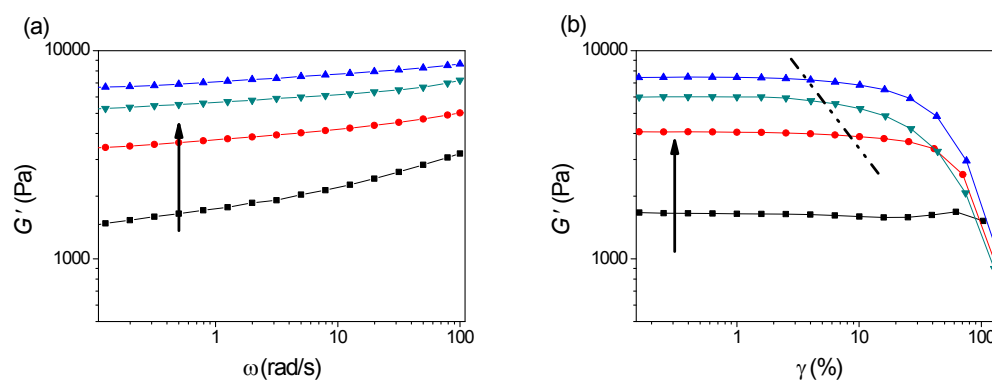

Figure S1. The frequency (a) and amplitude (b) dependence of storage modulus  $G'$  of the PVA-KGM hydrogels. The CFT times increase from 1 time to 4 times.

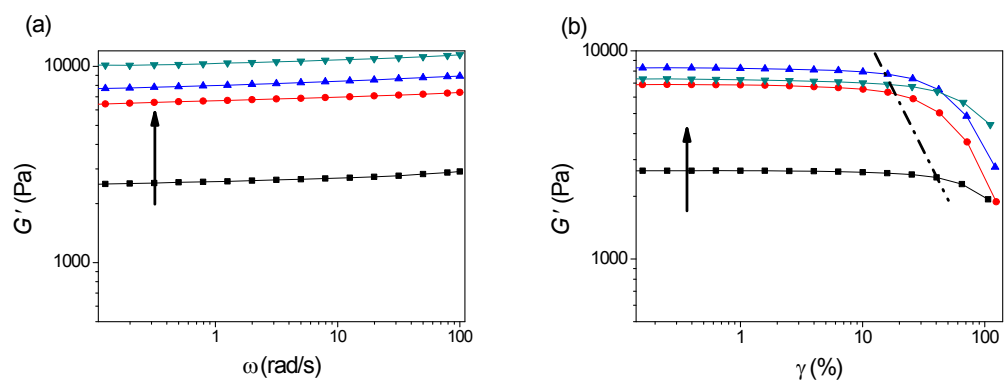

Figure S2. The frequency (a) and amplitude (b) dependence of storage modulus  $G'$  of the PVA-KGM/PAAm DN hydrogels. The CFT times increase from 1 time to 4 times. The AAm concentration used for the preparation of DN hydrogel is 4 M.

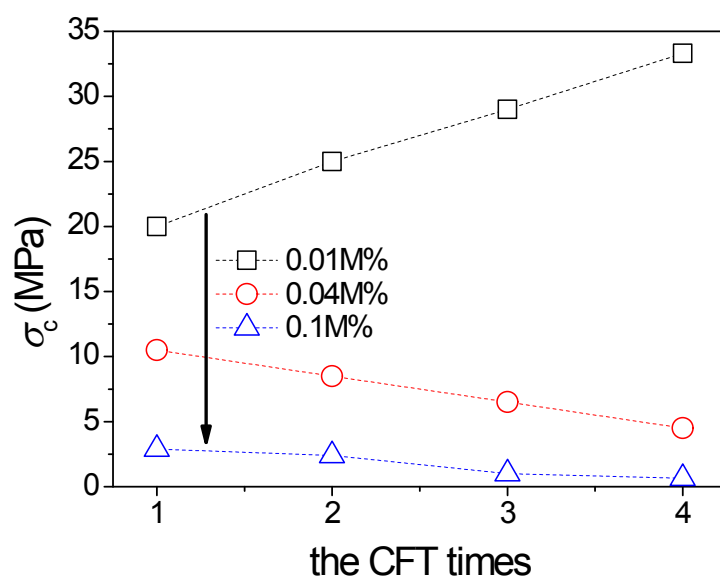

Figure S3. The effect of MBAA concentration on the compressive strength of the PVA-KGM/PAAm DN hydrogels. The AAm concentration used for the preparation of DN hydrogel is 4 M.
